# Supplementary material for: Cholinergic interneurons in the rat striatum modulate substitution of habits
Source: PubMed Central journal article supplement — Eur J Neurosci. 2018 Feb 19;47(10):1194–205. doi: 10.1111/ejn.13820 (PMC6001626; doi:10.1111/ejn.13820), 2018-02-19
Supplement: EJN-47-1194-s002.pdf [file EJN-47-1194-s002.pdf]

## Cholinergic interneurons in the rat striatum modulate substitution of habits

*Sho Aoki, Andrew W. Liu, Yumiko Akamine, Aya Zucca, Stefano Zucca & Jeffery R. Wickens*

---

**Review timeline:**

|                     |                  |
|---------------------|------------------|
| Submission date:    | 28 November 2017 |
| Editorial Decision: | 06 December 2017 |
| Revision received:  | 19 December 2017 |
| Editorial Decision: | 08 January 2018  |
| Revision received:  | 09 January 2018  |
| Accepted:           | 10 January 2018  |

---

Editor: Paul Bolam

**Note: This manuscript was transferred to us from the Journal of Neuroscience, under the terms of the NPRC scheme. The reviewers at Journal of Neuroscience were not informed of the possibility of their reviews being made public, so we cannot make these comments available.**

1st Editorial Decision

06 December 2017

Dear Jeff,

We have carefully looked at your submission and the revisions you have made in response to the J. Neurosci. reviewers and we are pleased to say that we expect it to be suitable for publication in EJN after you have dealt with a few minor points.

- Please indicate the total number of animals used and indicate in the text for each experiment (not just in fig captions)
- Source of wild type rats?
- Anesthesia prior to perfusion?
- Antibody dilutions used?
- COI statement needed
- In accordance with EJN guidelines, bar charts should be replaced by much more informative scatter plots or similar
- H2O2 is needed in the DAB incubation
- Lots of errors in the reference list e.g. Lv et al, Okada et al, Ravel.
- Inconsistent use of title or sentence case in the reference list

If you are able to respond fully to the points raised, we would be pleased to receive a revision of your paper within 30 days.

Thank you for your support of this Special Section

Best wishes,

Paul & John  
co-Editors in Chief, EJN

Authors' Response

19 December 2017

**We have marked all the changes in bold in the revised manuscript.**

- Please indicate the total number of animals used and indicate in the text for each experiment (not just in fig captions)

**We have added the number of animals for each experiment in the main text (Methods).**

- Source of wild type rats?

**It has been added in Methods.**

- Anesthesia prior to perfusion?

**We have added the relevant statement in Methods.**

- Antibody dilutions used?

**Thanks for pointing out. We have added dilutions for primary and secondary antibodies for each histological procedure. In addition, the procedure for NeuN staining was not mentioned in an original manuscript, so now we have added it in revision.**

- COI statement needed

**We have declared no conflict of interest after acknowledgement.**

- In accordance with EJN guidelines, bar charts should be replaced by much more informative scatter plots or similar

**We have changed all the figures with bar charts (Fig. 1-4, 6, and Supple Fig. 1). In each figure, individual data points have been put as scatter plots over bar charts.**

- H2O2 is needed in the DAB incubation

**We mentioned in Methods.**

- Lots of errors in the reference list e.g. Lv et al, Okada et al, Ravel.

- Inconsistent use of title or sentence case in the reference list

**We have checked EJN guidelines and amended reference lists accordingly.**

2nd Editorial Decision

08 January 2018

Dear Jeff,

Your revised manuscript has been re-evaluated by the editorial team and we are pleased to say that it will be accepted for publication in EJN once you have supplied us with higher resolution figures. Once done we will send it off to the publishers. We also need to discuss this Special Section, I will contact you soon.

If you are able to respond fully to the points raised, we shall be pleased to receive a revision of your paper within 30 days.

Thank you for submitting your work to EJN.

Best wishes,

Paul & John  
co-Editors in Chief, EJN

Authors' Response

09 January 2018

Higher resolution figures have been uploaded.
